# Supplementary material for: Synthesis and use of a surface-active initiator in emulsion polymerization under AGET and ARGET ATRP conditions
Source: Royal Society of Chemistry journal article supplement (doi:10.1039/b9nj00307j), 2009-11-06

**Supporting Information for the Manuscript**

**Synthesis and use of a surface-active initiator in emulsion  
polymerization under AGET and ARGET ATRP conditions**

Chuanjie Cheng, Jinbing Shu, Shanshan Gong, Liang Shen<sup>\*</sup>, Yongluo Qiao,  
Changqing Fu

Jiangxi Key Laboratory of Organic Chemistry, Jiangxi Science & Technology

Normal University, Fenglin Street, Nanchang, Jiangxi 330013, P. R. China

shenliang00@tsinghua.org.cn

Page 03 are the characterization section and Page 04-10 are the  $^1\text{H}$  NMR and  $^{13}\text{C}$  NMR spectra for compounds **4**, **5** and the acid form of **1**; Page 11 is the  $^1\text{H}$  NMR of the product PMMA.

The  $^1\text{H}$  NMR and  $^{13}\text{C}$  NMR spectra were recorded on a Bruker 400 MHz spectrometer in  $\text{CDCl}_3$ .

**List of  $^1\text{H}$  NMR and  $^{13}\text{C}$  NMR spectra for compounds **4**, **5**, the acid form of **1**, and the product PMMA.**

|         |                                                        |         |                                 |
|---------|--------------------------------------------------------|---------|---------------------------------|
| Page 04 | $^1\text{H}$ NMR of <b>4</b>                           | Page 05 | $^{13}\text{C}$ NMR of <b>4</b> |
| Page 06 | $^1\text{H}$ NMR of <b>5</b>                           | Page 07 | $^{13}\text{C}$ NMR of <b>5</b> |
| Page 08 | $^1\text{H}$ NMR of <b>1</b>                           | Page 09 | $^{13}\text{C}$ NMR of <b>1</b> |
| Page 10 | local amplification of $^{13}\text{C}$ NMR of <b>1</b> |         |                                 |
| Page 11 | $^1\text{H}$ NMR of the product PMMA                   |         |                                 |

#### The intermediate 4

IR:  $\nu$  3368, 2930, 2856, 1734, 1396, 1279, 1166  $\text{cm}^{-1}$ ;

$^1\text{H}$  NMR (400 MHz,  $\text{CDCl}_3$ ):  $\delta$  4.17 (t, 2H,  $J = 6.61$  Hz,  $\text{OCH}_2$ ), 3.63 (t, 2H,  $J = 6.64$  Hz,  $\text{CH}_2\text{OH}$ ), 2.05 (s, 1H,  $\text{OH}$ ), 1.93 (s, 6H,  $2\text{CH}_3$ ), 1.70-1.66 (m, 2H,  $\text{CH}_2$ ), 1.58-1.54 (m, 2H,  $\text{CH}_2$ ), 1.36-1.28 (m, 12H,  $6\text{CH}_2$ );

$^{13}\text{C}$  NMR (100 MHz,  $\text{CDCl}_3$ ):  $\delta$  171.7, 66.1, 62.9, 56.0, 32.7, 30.8, 29.5, 29.44, 29.36, 29.1 (2C), 28.3, 25.74, 25.71.

Anal Calcd for  $\text{C}_{14}\text{H}_{27}\text{BrO}_3$ : C, 52.02; H, 8.42. Found: C, 52.07; H, 8.39.

#### The intermediate 5

mp 29-31  $^\circ\text{C}$ .

IR:  $\nu$  3446, 3222, 2927, 2856, 1735, 1462, 1379, 1277, 1165  $\text{cm}^{-1}$ ;

$^1\text{H}$  NMR (400 MHz,  $\text{CDCl}_3$ ):  $\delta$  9.5 (*br s*, 1H), 6.49-6.40 (m, 2H,  $\text{CH}=\text{CH}$ ), 4.29 (t, 2H,  $J = 6.59$  Hz,  $\text{OCH}_2$ ), 4.17 (t, 2H,  $J = 6.50$  Hz,  $\text{OCH}_2$ ), 1.94 (s, 6H,  $2\text{CH}_3$ ), 1.74-1.65 (m, 4H,  $2\text{CH}_2$ ), 1.32-1.28 (m, 12H,  $6\text{CH}_2$ );

$^{13}\text{C}$  NMR (100 MHz,  $\text{CDCl}_3$ ):  $\delta$  171.8, 167.9, 164.7, 136.4, 129.8, 67.3, 66.1, 56.2, 30.7, 29.3, 29.2, 29.1, 29.03, 28.96, 28.3, 28.1, 25.70, 25.67.

Anal Calcd for  $\text{C}_{18}\text{H}_{29}\text{BrO}_6$ : C, 51.31; H, 6.94. Found: C, 51.36; H, 6.91.

#### The initiator/surfactant 1

IR:  $\nu$  3440 (*br*), 2930, 2856, 1733, 1637, 1400, 1275, 1227, 1166, 1045, 691  $\text{cm}^{-1}$ ;

$^1\text{H}$  NMR (400 MHz,  $\text{CDCl}_3$ ):  $\delta$  4.04 (t, 4H,  $J = 10.88$  Hz,  $2\text{OCH}_2$ ), 3.99-3.97 (m, 2H,  $\text{CH}_2$ ), 3.57 (t, 1H,  $J = 6.62$  Hz,  $\text{CH}$ ), 1.86 (s, 6H,  $2\text{CH}_3$ ), 1.62-1.49 (m, 4H,  $2\text{CH}_2$ ), 1.48-1.18 (m, 12H,  $6\text{CH}_2$ );

$^{13}\text{C}$  NMR (100 MHz,  $\text{CDCl}_3$ ):  $\delta$  177.6, 171.8, 169.0, 66.1, 65.9, 63.0, 56.0, 30.8 (2C), 29.44, 29.35, 29.10, 28.56, 28.52, 25.84, 25.75, 25.71.

Anal Calcd for  $\text{C}_{18}\text{H}_{31}\text{BrO}_9\text{S}$ : C, 42.91; H, 6.24. Found: C, 42.95; H, 6.21.

Compound 4:  $^1\text{H}$  NMR(400MHz,  $\text{CDCl}_3$ )

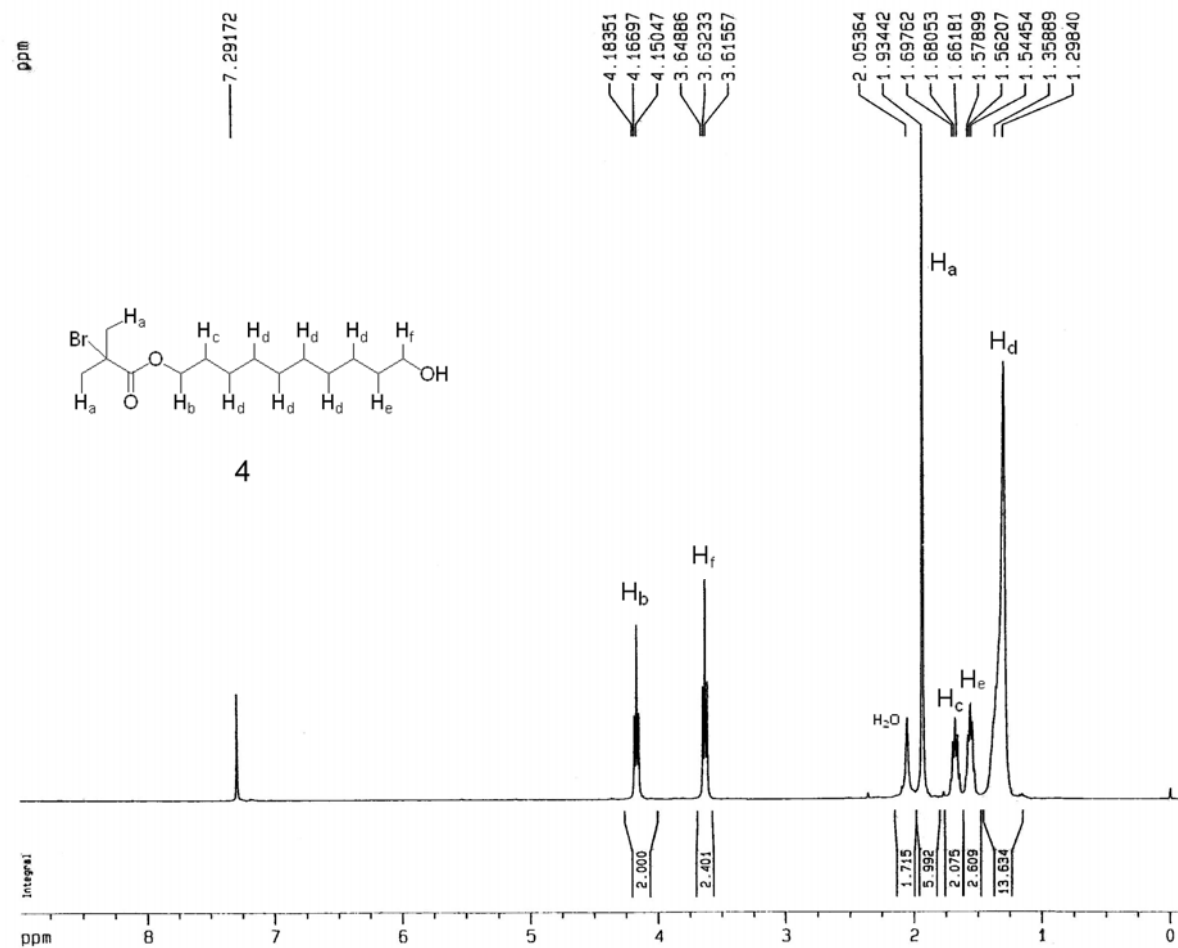

Compound 4:  $^{13}\text{C}$  NMR(100MHz,  $\text{CDCl}_3$ )

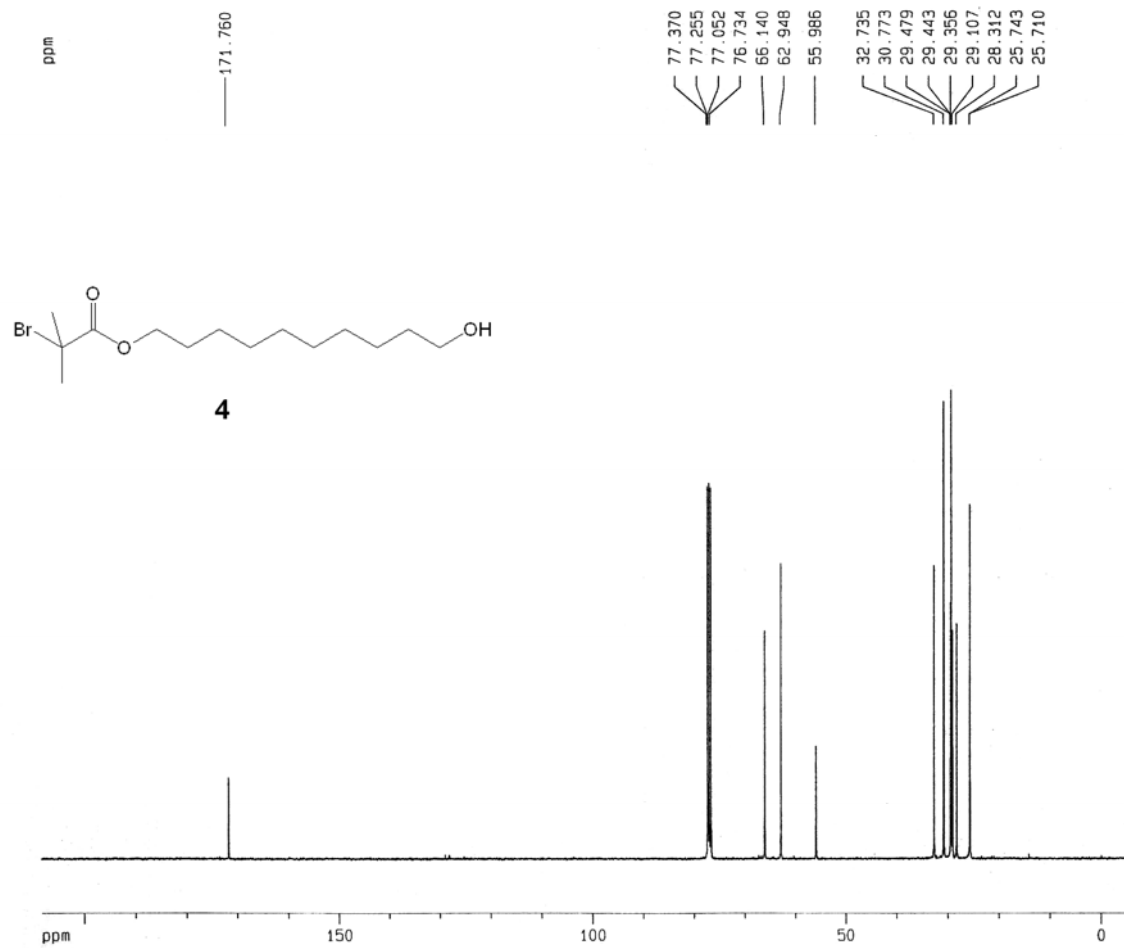

Compound 5:  $^1\text{H}$  NMR(400MHz,  $\text{CDCl}_3$ )

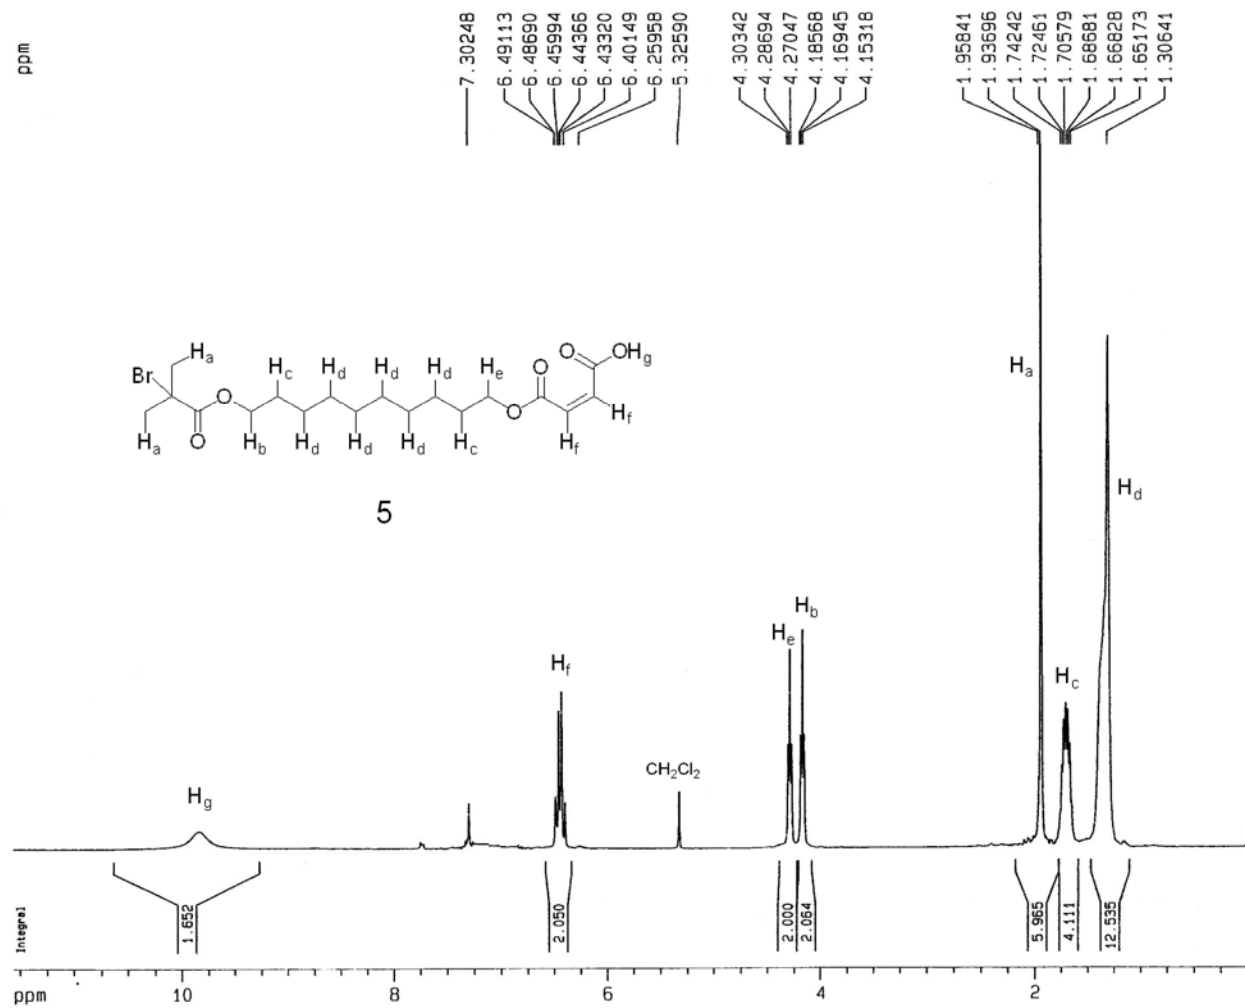

Compound **5**:  $^{13}\text{C}$  NMR(100MHz,  $\text{CDCl}_3$ )

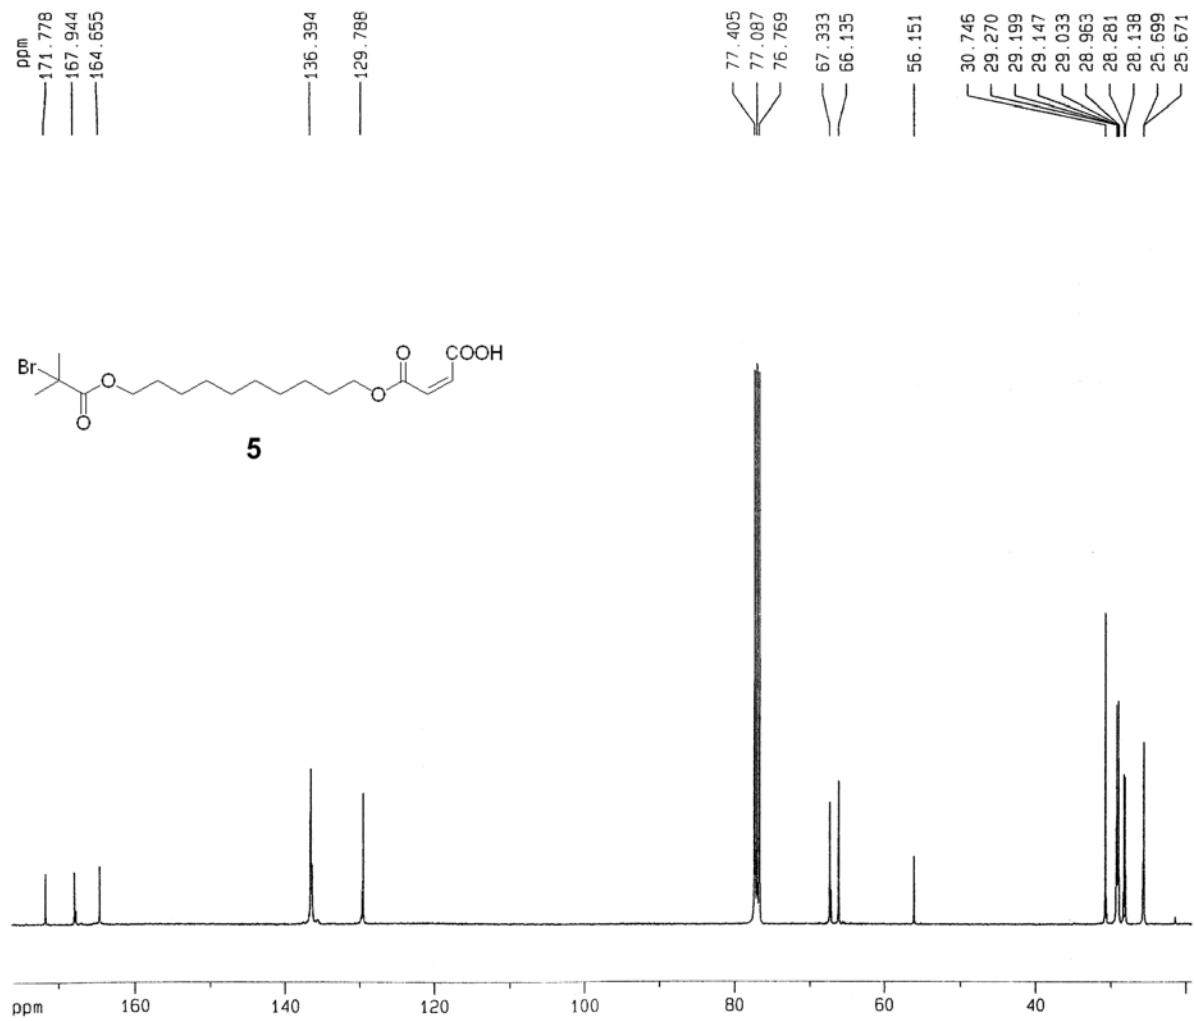

Compound 1:  $^1\text{H}$  NMR(400MHz,  $\text{CDCl}_3$ )

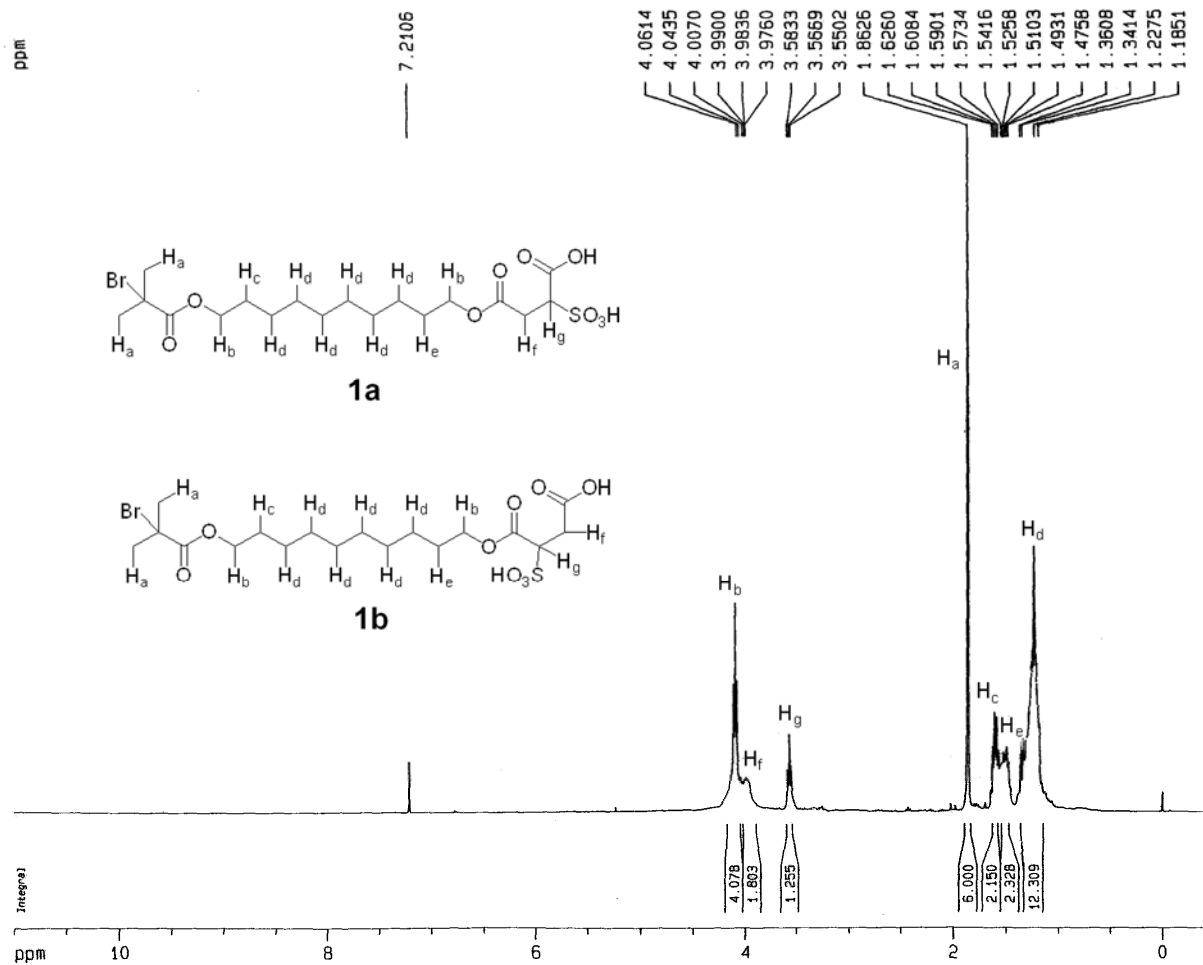



Compound 1:  $^{13}\text{C}$  NMR(100MHz,  $\text{CDCl}_3$ )

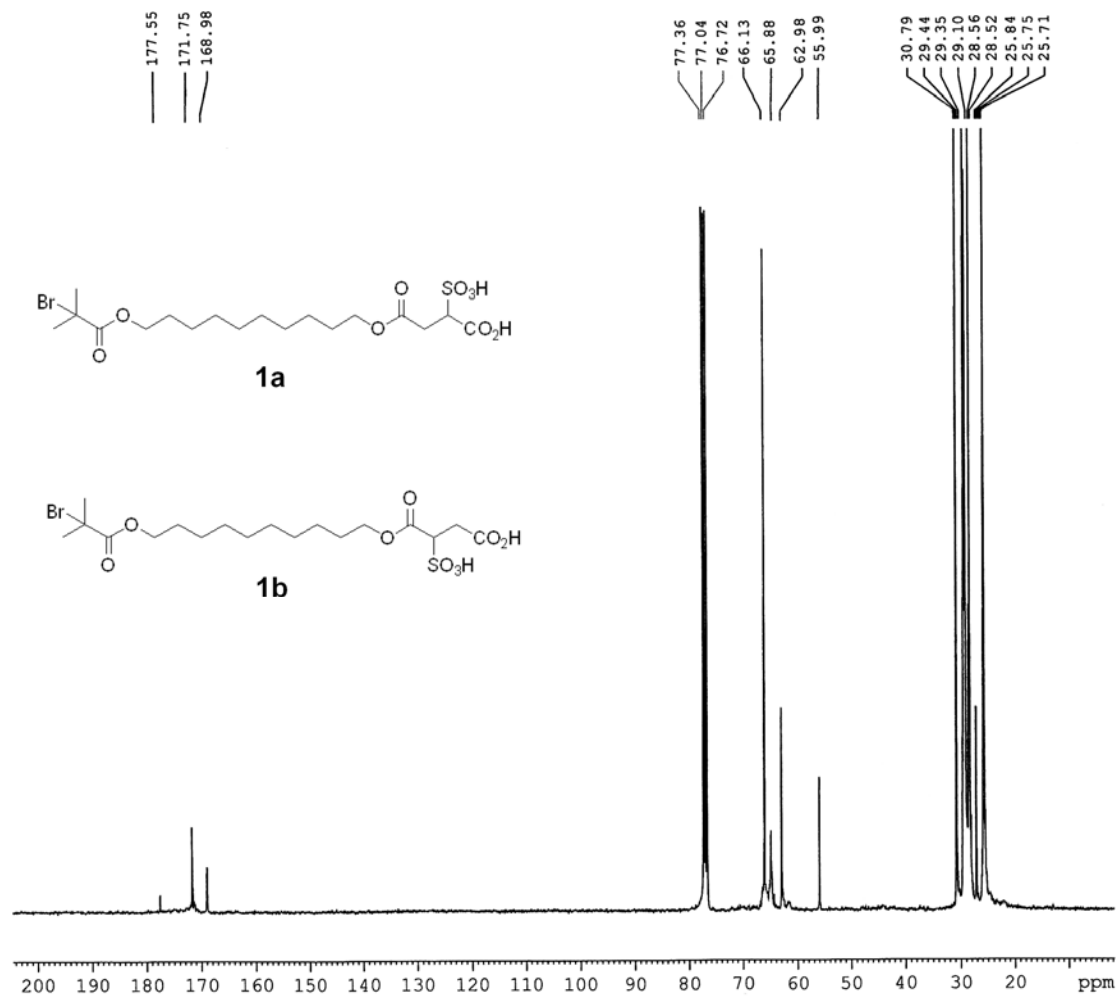

local amplification of  $^{13}\text{C}$  NMR of **1**

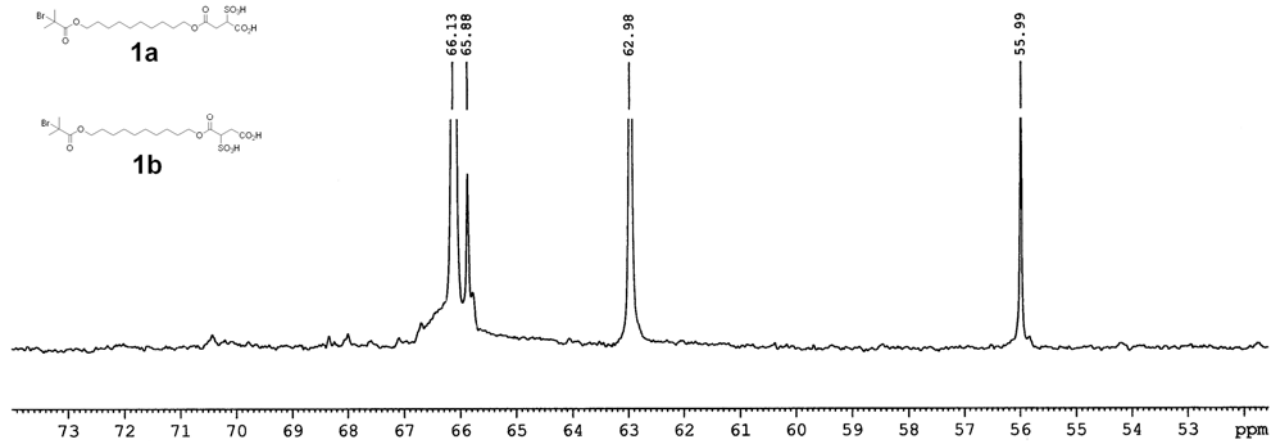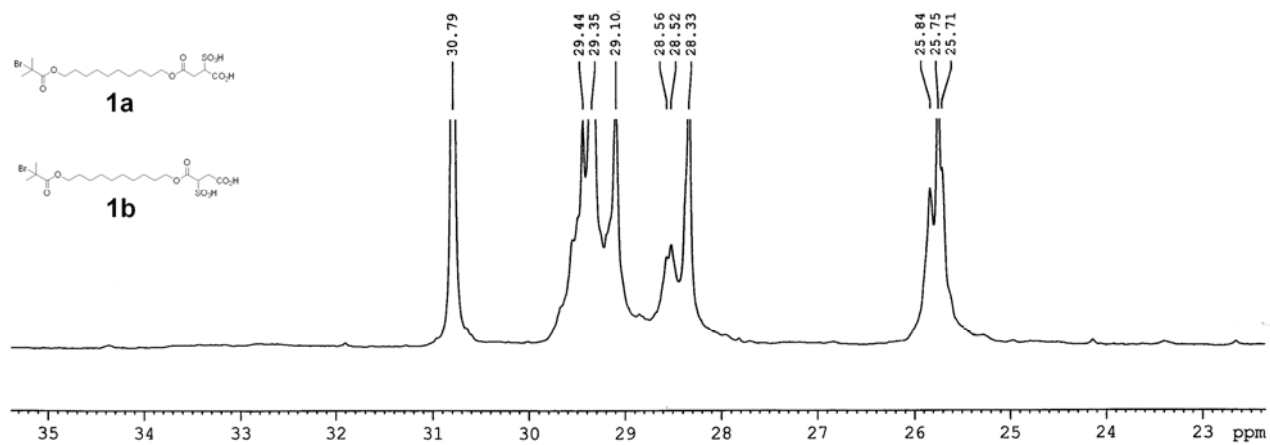

The  $^1\text{H}$  NMR of the product PMMA (Exp. A<sub>4</sub>)

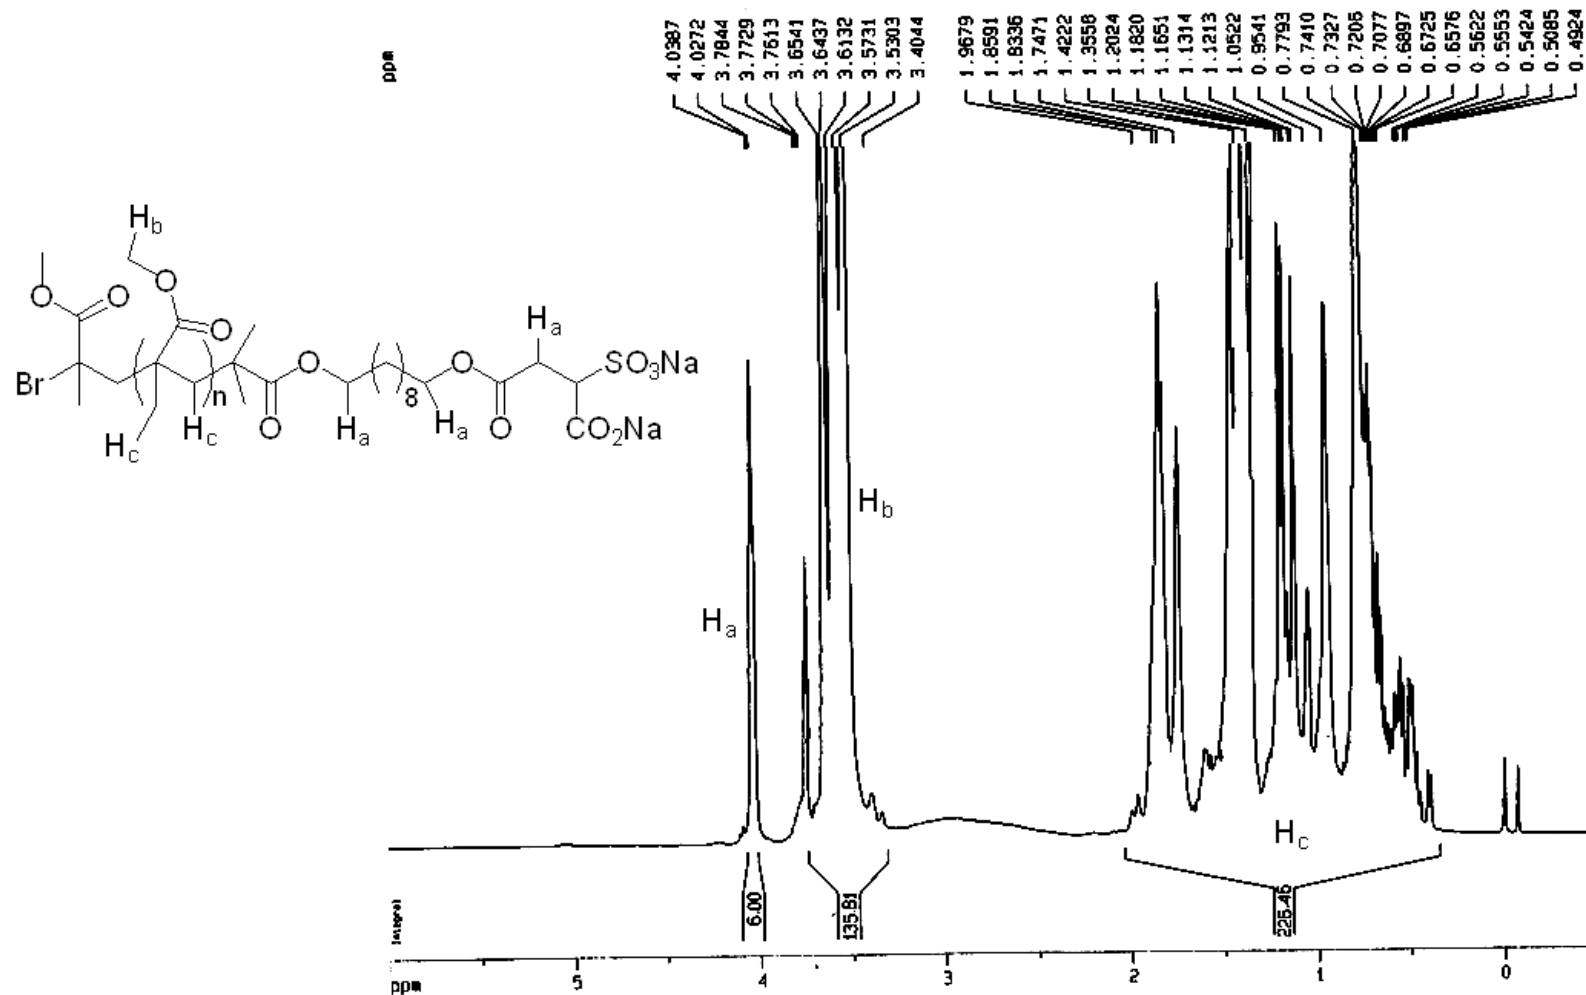

Supplement: b9nj00307j.pdf [file b9nj00307j.pdf]
